# Supplementary material for: A pressure induced reversal to the 9R perovskite in Ba3MoNbO8.5
Source: Royal Society of Chemistry journal article supplement (doi:10.1039/d0ta11270d), 2021-01-01
Supplement: d0ta11270d1.pdf [file d0ta11270d1.pdf]

## Supplementary Information

A Pressure Induced Structural Reversal to the 9R Perovskite in

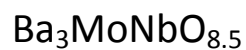

B. Sherwood <sup>a</sup>, C. J. Ridley <sup>b</sup>, C. L. Bull <sup>b</sup>, S. Fop <sup>a</sup>, A.C. McLaughlin <sup>a</sup> and E. J. Wildman <sup>a</sup>

<sup>a</sup> Department of Chemistry, University of Aberdeen, Meston Walk, Aberdeen AB24 3UE,  
United Kingdom

<sup>b</sup> ISIS Neutron and Muon Source, Rutherford Appleton Laboratory, Chilton, Didcot, OX11  
0QX, United Kingdom

**Table S1** Refined atomic parameters for Ba<sub>3</sub>MoNbO<sub>8.5</sub> from the Rietveld fit of the high-pressure neutron powder diffraction data recorded on the PEARL diffractometer.

| Atom         | Wy  | Parameter                           | 0.1 MPa    | 0.9 GPa    | 1.7 GPa    | 2.8 GPa    | 4.3 GPa    | 4.8 GPa      |
|--------------|-----|-------------------------------------|------------|------------|------------|------------|------------|--------------|
| Ba(1)        | 3a  | Occupancy                           | 1.00       | 1.00       | 1.00       | 1.00       | 1.00       | 1.00         |
|              |     | $U_{11} = U_{22}$ (Å <sup>2</sup> ) | 0.015 (2)  | 0.010 (1)  | 0.016 (1)  | 0.011 (1)  | 0.010 (1)  | 0.004 (1)    |
|              |     | $U_{33}$ (Å <sup>2</sup> )          | 0.034 (4)  | 0.023 (3)  | 0.010 (2)  | 0.016 (3)  | 0.001 (2)  | 0.001 (2)    |
|              |     | $U_{12}$ (Å <sup>2</sup> )          | 0.0076 (8) | 0.0050 (7) | 0.0079 (7) | 0.0055 (5) | 0.0048 (6) | 0.0019 (5)   |
| Ba(2)        | 6c  | $z$                                 | 0.2071 (5) | 0.2063 (4) | 0.2082 (3) | 0.2086 (3) | 0.2108 (3) | 0.211000 (0) |
|              |     | Occupancy                           | 1.00       | 1.00       | 1.00       | 1.00       | 1.00       | 1.00         |
|              |     | $U_{11} = U_{22}$ (Å <sup>2</sup> ) | 0.015 (2)  | 0.010 (1)  | 0.016 (1)  | 0.011 (1)  | 0.010 (1)  | 0.004 (1)    |
|              |     | $U_{33}$ (Å <sup>2</sup> )          | 0.034 (4)  | 0.023 (3)  | 0.010 (2)  | 0.016 (3)  | 0.001 (2)  | 0.001 (2)    |
| M(1)         | 6c  | $z$                                 | 0.3994 (3) | 0.3995 (3) | 0.4004 (2) | 0.3992 (2) | 0.3973 (3) | 0.3962 (3)   |
|              |     | Occupancy                           | 0.920 (3)  | 0.920 (3)  | 0.926 (4)  | 0.924 (3)  | 0.920 (3)  | 0.904 (3)    |
|              |     | $U_{11} = U_{22}$ (Å <sup>2</sup> ) | 0.013 (2)  | 0.008 (2)  | 0.002 (1)  | 0.000 (1)  | 0.001 (1)  | 0.003 (1)    |
|              |     | $U_{33}$ (Å <sup>2</sup> )          | 0.038 (4)  | 0.046 (4)  | 0.051 (3)  | 0.056 (3)  | 0.064 (3)  | 0.056 (3)    |
| M(2)         | 6c  | $z$                                 | 0.5303 (3) | 0.5304 (3) | 0.5311 (2) | 0.5302 (2) | 0.5289 (3) | 0.5273 (3)   |
|              |     | Occupancy                           | 0.160 (7)  | 0.160 (7)  | 0.148 (8)  | 0.152 (6)  | 0.162 (6)  | 0.194 (4)    |
|              |     | $U_{11} = U_{22}$ (Å <sup>2</sup> ) | 0.013 (2)  | 0.008 (2)  | 0.002 (1)  | 0.000 (1)  | 0.001 (1)  | 0.003 (1)    |
|              |     | $U_{33}$ (Å <sup>2</sup> )          | 0.038 (4)  | 0.046 (4)  | 0.051 (3)  | 0.056 (3)  | 0.064 (3)  | 0.056 (3)    |
| O(1)         | 18h | $x$                                 | 0.1711 (3) | 0.1716 (3) | 0.1705 (3) | 0.1702 (3) | 0.1706 (1) | 0.1717 (1)   |
|              |     | $y$                                 | 0.8289 (3) | 0.8284 (3) | 0.8295 (3) | 0.8298 (3) | 0.8294 (1) | 0.8283 (1)   |
|              |     | $z$                                 | 0.1033 (1) | 0.1037 (1) | 0.1036 (1) | 0.1035 (1) | 0.1039 (1) | 0.1050 (1)   |
|              |     | Occupancy                           | 1.00       | 1.00       | 1.00       | 1.00       | 1.00       | 1.00         |
| O(2)         | 9e  | $U_{11} = U_{22}$ (Å <sup>2</sup> ) | 0.030 (1)  | 0.026 (1)  | 0.025 (1)  | 0.0234 (9) | 0.0175 (8) | 0.0172 (7)   |
|              |     | $U_{33}$ (Å <sup>2</sup> )          | 0.012 (1)  | 0.010 (1)  | 0.015 (1)  | 0.016 (1)  | 0.017 (1)  | 0.0144 (8)   |
|              |     | $U_{12}$ (Å <sup>2</sup> )          | 0.0183 (6) | 0.0165 (6) | 0.0160 (5) | 0.0152 (5) | 0.0123 (4) | 0.0121 (4)   |
|              |     | Occupancy                           | 0.477 (8)  | 0.506 (7)  | 0.510 (6)  | 0.583 (6)  | 0.715 (6)  | 0.789 (6)    |
| O(3)         | 36i | $x$                                 | 0.082 (5)  | 0.075 (1)  | 0.0754 (9) | 0.077 (1)  | 0.0770 (1) | 0.0781 (1)   |
|              |     | $y$                                 | 0.094 (4)  | 0.087 (1)  | 0.0872 (9) | 0.088 (1)  | 0.0887 (1) | 0.0898 (1)   |
|              |     | $z$                                 | 0.327 (1)  | 0.320 (1)  | 0.3202 (9) | 0.321 (1)  | 0.3218 (1) | 0.3229 (1)   |
|              |     | Occupancy                           | 0.089 (2)  | 0.082 (2)  | 0.081 (1)  | 0.062 (1)  | 0.029 (2)  | 0.011 (1)    |
|              |     | $U_{iso}$ (Å <sup>2</sup> )         | 0.038 (9)  | 0.05 (1)   | 0.054 (9)  | 0.05 (1)   | 0.05 (3)   | 0.03 (5)     |
| $\chi^2$     |     |                                     | 0.93       | 0.90       | 1.17       | 1.14       | 0.98       | 0.86         |
| $R_p$ (%)    |     |                                     | 3.00       | 2.69       | 2.28       | 2.26       | 2.49       | 2.61         |
| $R_{wp}$ (%) |     |                                     | 2.77       | 2.72       | 2.27       | 2.12       | 2.22       | 2.26         |

**Table S2** Bond lengths calculated from the Rietveld refinement of high-pressure powder neutron diffraction data of Ba<sub>3</sub>MoNbO<sub>8.5</sub>.

| Distance (Å) | 0.1 MPa    | 0.9 GPa    | 1.7 GPa    | 2.8 GPa    | 4.3 GPa    | 4.8 GPa    |
|--------------|------------|------------|------------|------------|------------|------------|
| Ba(1)–O(1)   | 2.8022 (3) | 2.7971 (3) | 2.778 (2)  | 2.759 (2)  | 2.743 (2)  | 2.757 (2)  |
| Ba(1)–O(2)   | 2.9670 (5) | 2.9494 (4) | 2.9362 (3) | 2.9189 (3) | 2.8935 (4) | 2.8859 (4) |
| Ba(1)–O(3)   | 3.0221 (5) | 3.047 (7)  | 3.034 (6)  | 3.008 (8)  | 2.9792 (7) | 2.9646 (7) |
|              | 3.4086 (5) | 3.391 (1)  | 3.3759 (9) | 3.3552 (9) | 3.3257 (4) | 3.3163 (4) |
|              | 3.9172 (6) | 3.865 (4)  | 3.848 (3)  | 3.830 (4)  | 3.7980 (6) | 3.7922 (6) |
| Ba(2)–O(1)   | 2.8108 (3) | 2.780 (7)  | 2.794 (6)  | 2.785 (6)  | 2.790 (5)  | 2.773 (1)  |
|              | 3.0068 (4) | 2.990 (2)  | 2.971 (1)  | 2.953 (1)  | 2.9193 (9) | 2.9082 (4) |
| Ba(2)–O(2)   | 3.1699 (4) | 3.167 (7)  | 3.122 (6)  | 3.098 (6)  | 3.031 (5)  | 3.0154 (3) |
| Ba(2)–O(3)   | 2.5903 (4) | 2.44 (2)   | 2.40 (2)   | 2.40 (2)   | 2.341 (6)  | 2.349 (2)  |
| M(1)–O(1)    | 1.8435 (2) | 1.832 (4)  | 1.824 (3)  | 1.827 (3)  | 1.827 (3)  | 1.834 (3)  |
| M(1)–O(2)    | 2.2091 (2) | 2.198 (4)  | 2.202 (3)  | 2.173 (3)  | 2.130 (4)  | 2.108 (4)  |
| M(1)–O(3)    | 1.6144 (2) | 1.74 (2)   | 1.75 (2)   | 1.69 (2)   | 1.632 (6)  | 1.583 (6)  |
| M(2)–O(1)    | 2.1384 (2) | 2.118 (3)  | 2.118 (3)  | 2.111 (2)  | 2.082 (2)  | 2.053 (2)  |

**Table S3** Bond angles calculated from the Rietveld refinement of high-pressure powder neutron diffraction data of Ba<sub>3</sub>MoNbO<sub>8.5</sub>.

| Angle (°)      | 0.1 MPa     | 0.9 GPa   | 1.7 GPa   | 2.8 GPa   | 4.3 GPa   | 4.8 GPa   |
|----------------|-------------|-----------|-----------|-----------|-----------|-----------|
| O(1)–M(1)–O(1) | 103.113 (6) | 102.8 (2) | 103.7 (2) | 102.9 (2) | 101.2 (2) | 99.5 (2)  |
| O(1)–M(1)–O(2) | 85.343 (7)  | 85.59 (9) | 85.30 (8) | 85.46 (7) | 85.96 (7) | 86.62 (7) |
| O(1)–M(1)–O(3) | 99.576 (8)  | 102.4 (3) | 101.8 (3) | 101.8 (4) | 102.7 (1) | 103.4 (1) |
|                | 111.688 (6) | 112.5 (2) | 111.9 (2) | 112.3 (2) | 113.5 (2) | 114.6 (2) |
|                | 132.390 (1) | 130.2 (4) | 129.3 (4) | 130.5 (5) | 132.4 (3) | 134.4 (3) |
| O(2)–M(1)–O(2) | 84.371 (9)  | 84.3 (2)  | 83.6 (1)  | 84.4 (2)  | 85.6 (2)  | 86.4 (2)  |
| O(1)–M(2)–O(1) | 84.939 (9)  | 85.1 (1)  | 85.21 (9) | 85.21 (9) | 85.43 (4) | 85.94 (4) |
|                | 95.061 (9)  | 95.0 (1)  | 94.79 (9) | 94.79 (9) | 94.57 (4) | 94.06 (4) |

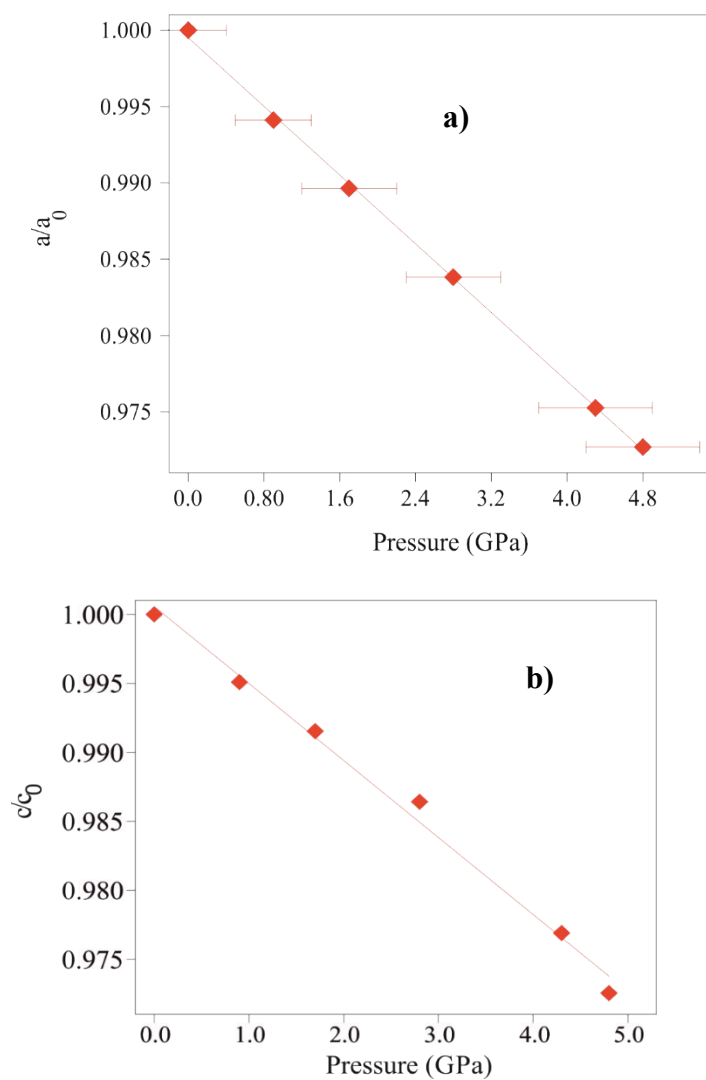

**Figure S1** Variation of normalised unit cell parameter  $a$  (a) and  $c$  (b) with pressure for  $\text{Ba}_3\text{MoNbO}_{8.5}$ . The error arising from the Pb pressure marker is shown in a). Both axes undergo an axial compressibility of  $k = 5.6 \times 10^{-3} \text{ GPa}^{-1}$  which was determined from the linear fit.

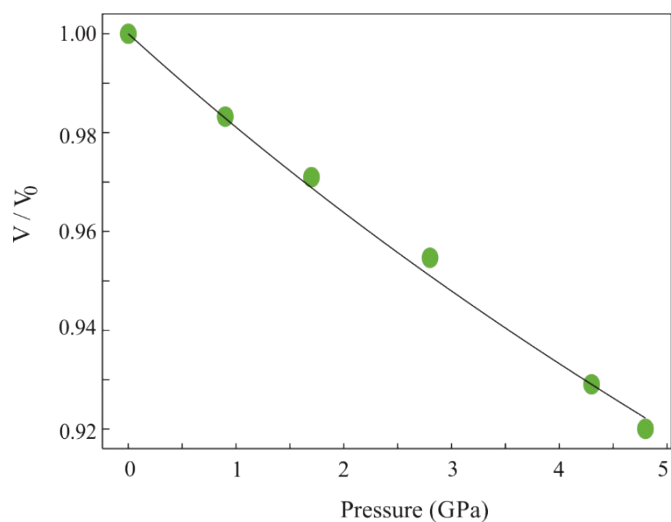

**Figure S2** Variation of normalised unit cell volume with pressure for  $\text{Ba}_3\text{MoNbO}_{8.5}$ . The data is fit with a second order Birch-Murnaghan fit revealing a bulk modulus ( $K_0$ ) of 50(1) GPa for the refined  $V_0$  value of 644.8(6)  $\text{\AA}^3$ .

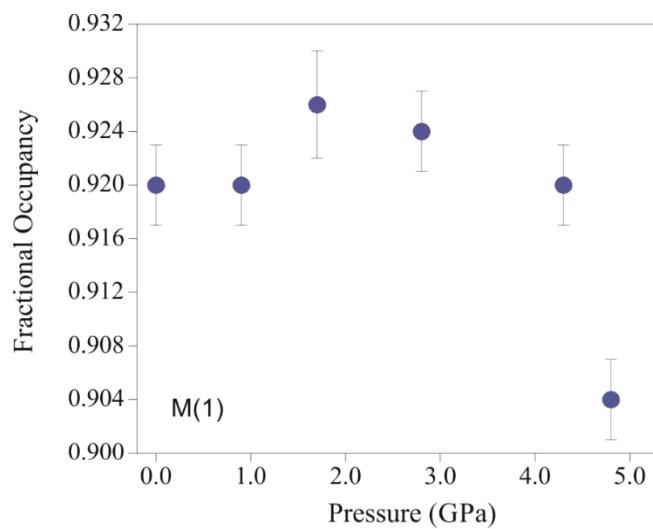

**Figure S3** Variation of the M(1) site fractional occupancy of  $\text{Ba}_3\text{MoNbO}_{8.5}$  with pressure.

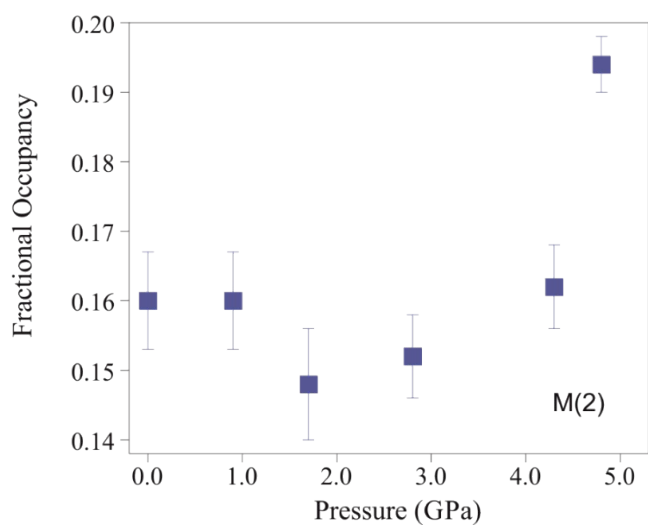

**Figure S4** Variation of the M(2) site fractional occupancy of  $\text{Ba}_3\text{MoNbO}_{8.5}$  with pressure.

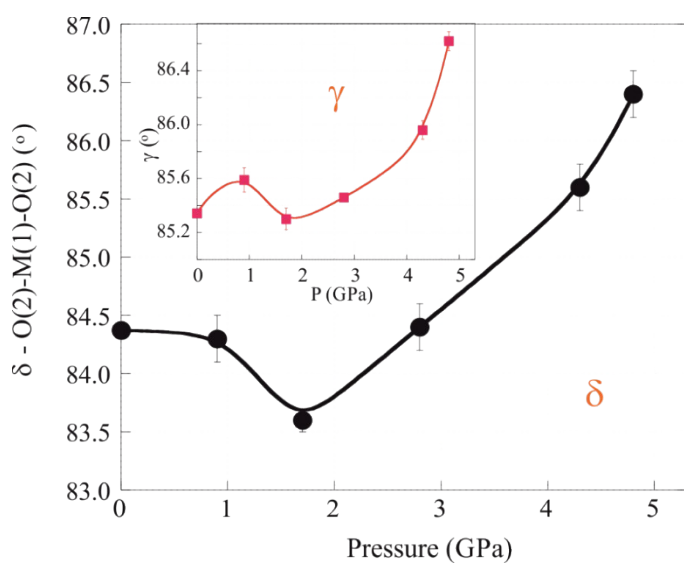

**Figure S5** Pressure dependency of  $\delta - \text{O}(2)\text{-M}(1)\text{-O}(2)$  and  $\gamma - \text{O}(1)\text{-M}(1)\text{-O}(2)$  angles for the M(1) polyhedra.

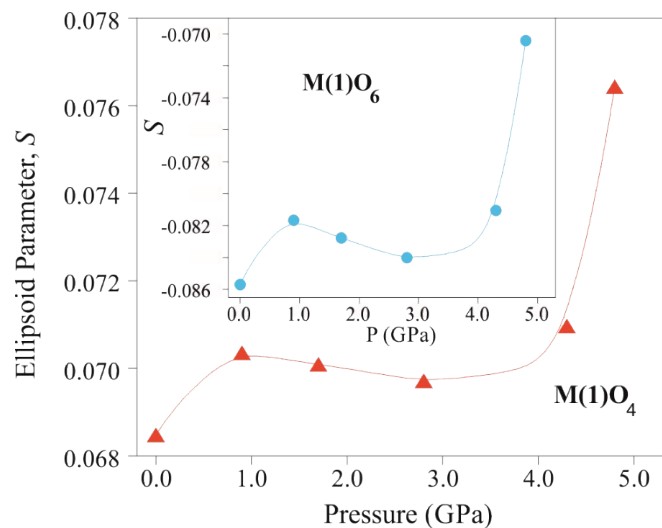

**Figure S6** Pressure dependency of the ellipsoid shape parameter,  $S$ , for the  $M(1)O_6$  and  $M(1)O_4$  polyhedra.

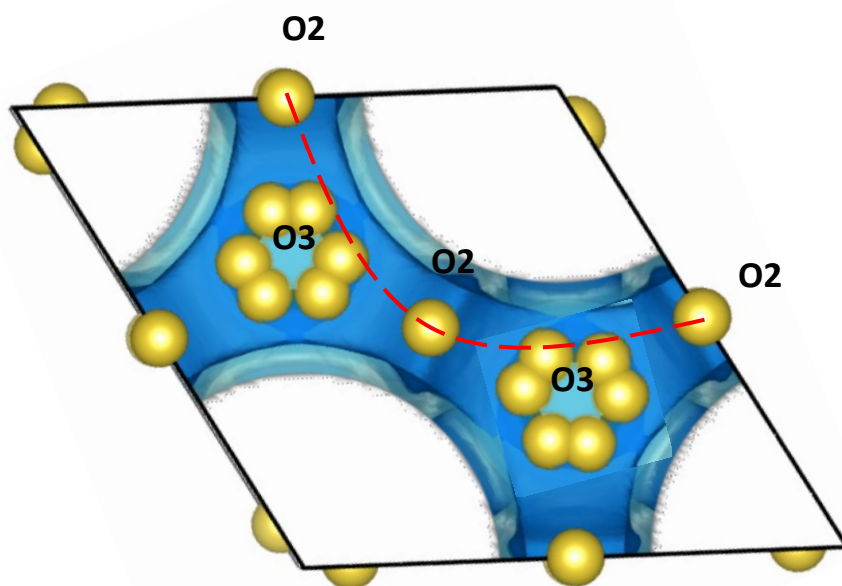

**Figure S7** Bond valence site energy map and view of the 2-dimensional diffusion pathway, as seen along the  $c$  axis. The dashed red line shows the connectivity between O2/O3 sites.

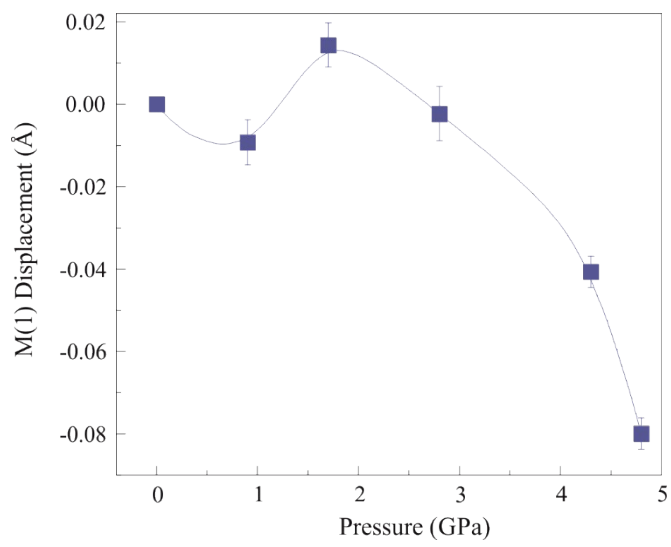

**Figure S8** Variation of the M(1) displacement with pressure.
